# Supplementary material
Source: Springer Nature journal article supplement (https://www.springermedizin.de/resource/supplementary/13063_2005_128_MOESM1_ESM.pdf/9427542)
Supplement: MOESM1 [file 9427542]

**Table 2: Study plan**

|                                      | Screening |   | Randomised treatment phase |   |                |    |                |    |                |    | Every 6 months <sup>a</sup> | Final visit <sup>b</sup> |
|--------------------------------------|-----------|---|----------------------------|---|----------------|----|----------------|----|----------------|----|-----------------------------|--------------------------|
| Visit                                | 1         | 2 | 3                          | 4 | 5              | 6  | 7              | 8  | 9              | 10 |                             |                          |
| Month                                | -14 days  | 0 | 3                          | 6 | 12             | 18 | 24             | 30 | 36             | 42 |                             |                          |
| Informed consent                     | ✓         |   |                            |   |                |    |                |    |                |    |                             |                          |
| Medical history                      | ✓         |   |                            |   |                |    |                |    |                |    |                             |                          |
| Inclusion/exclusion criteria         | ✓         |   |                            |   |                |    |                |    |                |    |                             |                          |
| Physical examination <sup>c</sup>    | ✓         |   |                            |   | ✓ <sup>d</sup> |    |                |    |                |    |                             | ✓                        |
| Clinical chemistry <sup>e</sup>      | ✓         |   |                            |   | ✓ <sup>f</sup> |    |                |    |                |    |                             | ✓ <sup>g</sup>           |
| CK and ALT <sup>h,i</sup>            | ✓         |   | j                          | j | ✓              | j  | ✓              | j  | ✓              | j  | ✓                           | ✓                        |
| Lipid profile and hsCRP <sup>k</sup> | ✓         |   | ✓                          |   | ✓              |    | ✓ <sup>l</sup> |    | ✓ <sup>l</sup> |    | ✓ <sup>l</sup>              | ✓ <sup>l</sup>           |
| Dialysis data <sup>m</sup>           | ✓         |   |                            |   | ✓              |    |                |    |                |    |                             |                          |
| AE review                            |           | ✓ | ✓                          | ✓ | ✓              | ✓  | ✓              | ✓  | ✓              | ✓  | ✓                           | ✓                        |
| Endpoint review                      |           |   | ✓                          | ✓ | ✓              | ✓  | ✓              | ✓  | ✓              | ✓  | ✓                           | ✓                        |
| Study drug dispensing                |           | ✓ |                            | ✓ | ✓              | ✓  | ✓              | ✓  | ✓              | ✓  | ✓                           | ✓                        |
| Study drug compliance                |           |   |                            | ✓ | ✓              | ✓  | ✓              | ✓  | ✓              | ✓  | ✓                           | ✓                        |
| Concomitant medications              | ✓         | ✓ | ✓                          | ✓ | ✓              | ✓  | ✓              | ✓  | ✓              | ✓  | ✓                           | ✓                        |

<sup>a</sup>If the study is still ongoing, further check-ups will be performed every 6 months; <sup>b</sup>The final visit will occur when 620 subjects with major cardiovascular events have been recorded and also if the study is terminated early; <sup>c</sup>Resting heart rate, blood pressure, height and weight to be measured after the dialysis session; <sup>d</sup>Blood pressure only to be measured at this visit; <sup>e</sup>Performed at the central laboratory and including TSH (at baseline only) and complete blood count measured pre-dialysis; <sup>f</sup>Haemoglobin, haematocrit, albumin, calcium and phosphate only; <sup>g</sup>Complete clinical chemistry and blood count only; <sup>h</sup>Pre-dialysis CK and ALT to be measured at 12 monthly intervals at central laboratory; <sup>i</sup>CK may be measured locally if subject suffers from muscle pains at any time during the study; <sup>j</sup>Pre-dialysis ALT measured locally every 12 months when not assessed centrally; <sup>k</sup>TC, LDL-C, HDL-C, non-HDL-C, TC/HDL-C, LDL-C/HDL-C, TG, Apo B, Apo AI, Apo B/Apo AI ratio, oxidised LDL and hsCRP will be measured by a central laboratory. Subjects should fast for 6 hours prior to lipid assessment pre-dialysis; <sup>l</sup>Only changes in TC, LDL-C, HDL-C and TG to be measured; <sup>m</sup>Pre- and post-urea measurements to calculate dialysis adequacy, method and duration (hours/week)

**ALT:** Alanine transaminase, **AE:** Adverse events, **Apo AI:** Apolipoprotein AI, **Apo B:** Apolipoprotein B, **CK:** Creatine kinase, **HDL-C:** High-density lipoprotein cholesterol, **hsCRP:** High-sensitivity C-reactive protein, **LDL-C:** Low-density lipoprotein cholesterol, **TC:** Total cholesterol, **TG:** Triglycerides, **TSH:** Thyroid stimulating hormone
